# Supplementary material
Source: Springer Nature journal article supplement (https://www.springermedizin.de/resource/supplementary/13256_2013_2803_MOESM8_ESM.pdf/9650522)
Supplement: MOESM8 [file 9650522]

Table 2

Occurrence of extracutaneous symptoms as reported in 23 articles

| <b>CNS</b>                           | Patients | References                          |
|--------------------------------------|----------|-------------------------------------|
| Mental and motor retardation         | 55       | (1, 4, 7, 9-16)                     |
| Cramps / seizures                    | 41       | (1, 4, 5, 7, 10-12, 15, 17-20)      |
| Delayed motor and mental development | 20       | (2, 11, 13-22)                      |
| Hypotonia                            | 15       | (1, 5, 11, 17-20, 22, 23)           |
| Microcephaly                         | 12       | (1, 7, 12)                          |
| Other                                | 16       | (5, 7, 11, 14, 15, 17-21)           |
| <b>Musculo-skeletal</b>              |          |                                     |
| Cranio facial abnormalities          | 24       | (4, 5, 12, 13, 17, 20, 20, 22)      |
| Scoliosis                            | 17       | (1, 2, 6, 16, 17, 23)               |
| Short stature                        | 12       | (1, 4)                              |
| Hemihypertrophy                      | 10       | (3, 7, 10, 13, 17, 19, 21)          |
| Clinodactyly                         | 9        | (1-3, 9, 16)                        |
| Thorax-deformities                   | 9        | (1, 5, 13, 21)                      |
| Other                                | 39       | (1-6, 9, 11-14, 17-23)              |
| <b>Ocular</b>                        |          |                                     |
| Hypo-/Hypertelorism                  | 9        | (1, 2, 9, 14-17, 22)                |
| Other                                | 35       | (1, 2, 5, 7, 11, 14, 15, 17, 20-23) |
| <b>Cardiac</b>                       |          |                                     |
| Other                                | 6        | (1, 20, 22)                         |
